# Supplementary material for: Regulation of estrogen signaling and breast cancer proliferation by an ubiquitin ligase TRIM56
Source: PubMed Central journal article supplement (PMC6473003; doi:10.1038/s41389-019-0139-x), 2019-04-18

# Supplementary figure 1

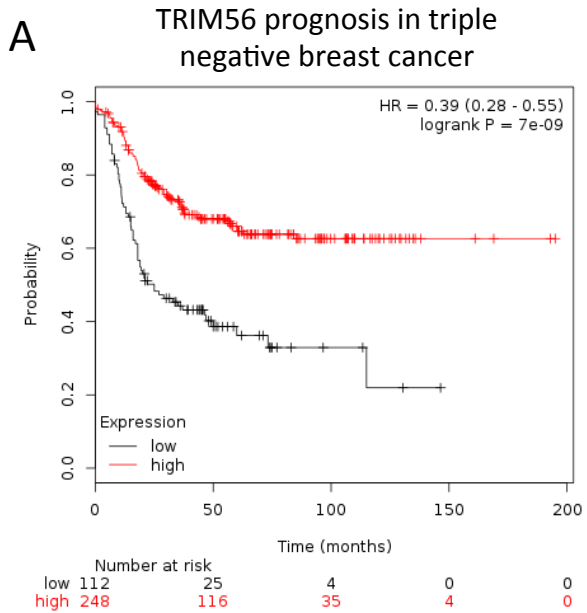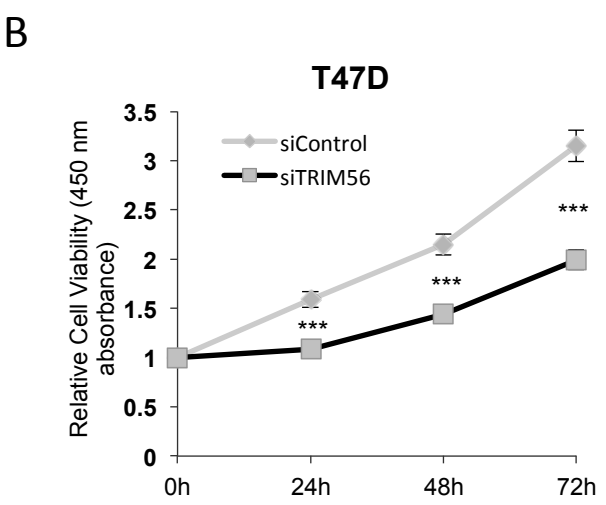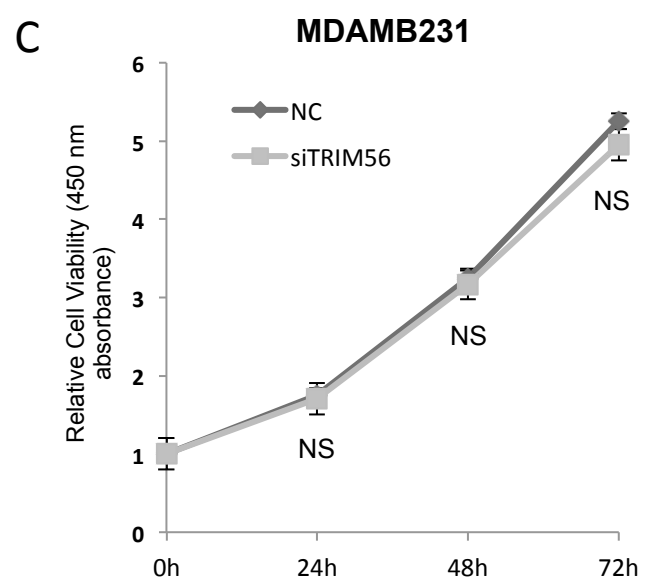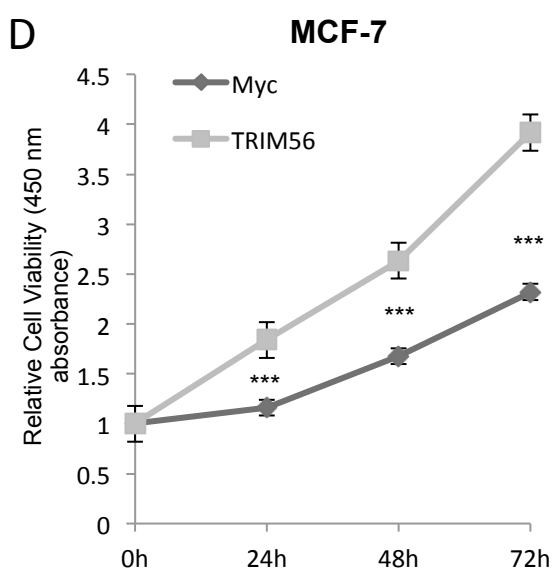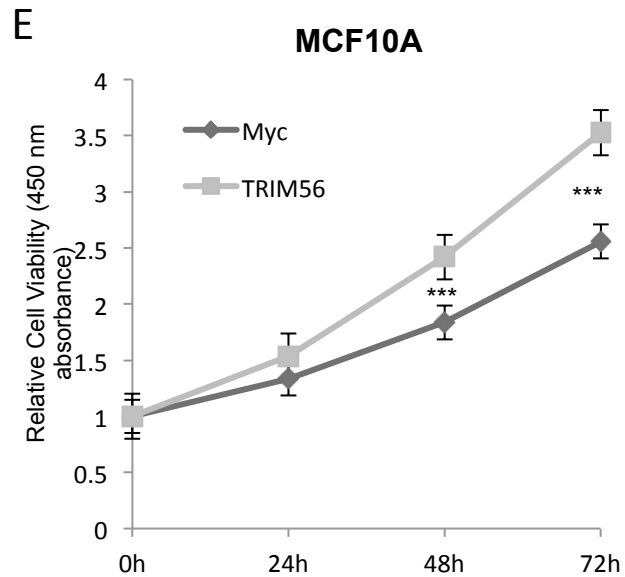

# Supplementary figure 2

## SiControl

## SiTRIM56

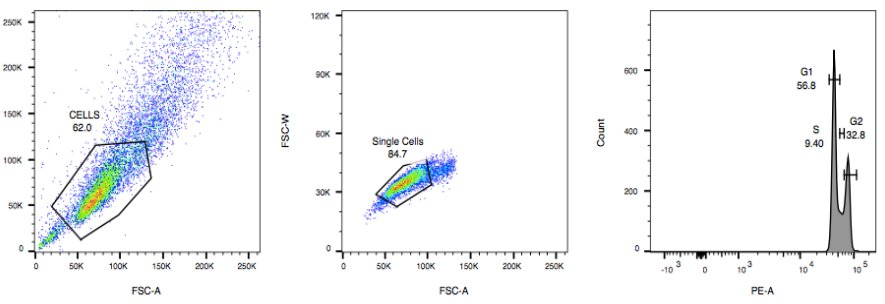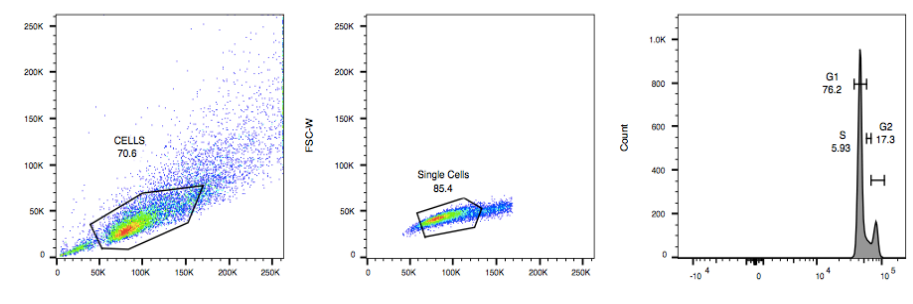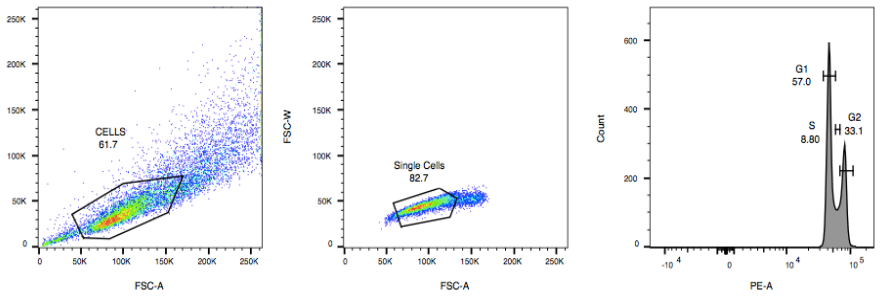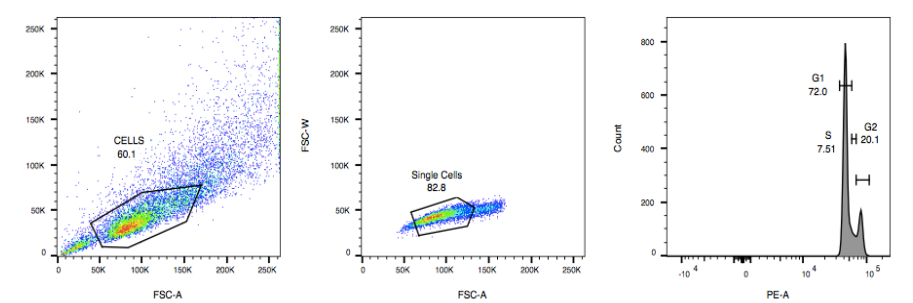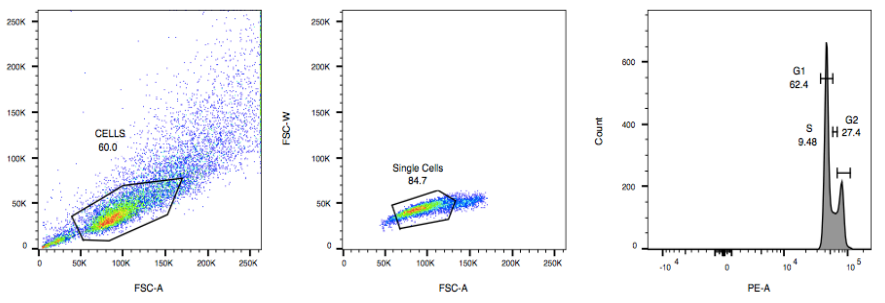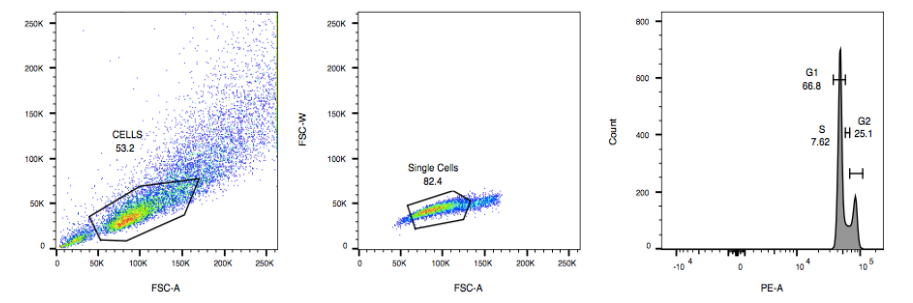

# Supplementary figure 3

A

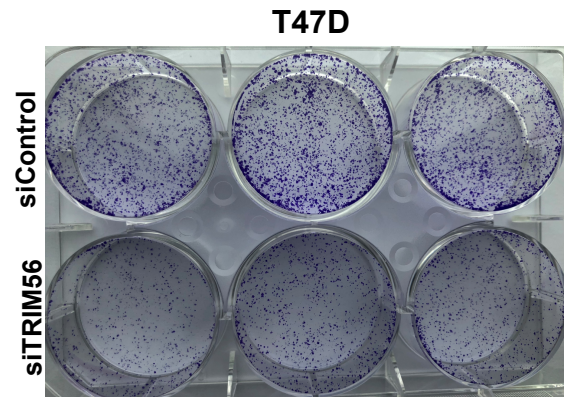

B

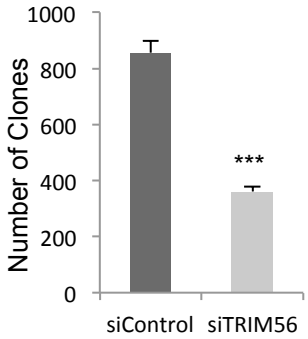

C

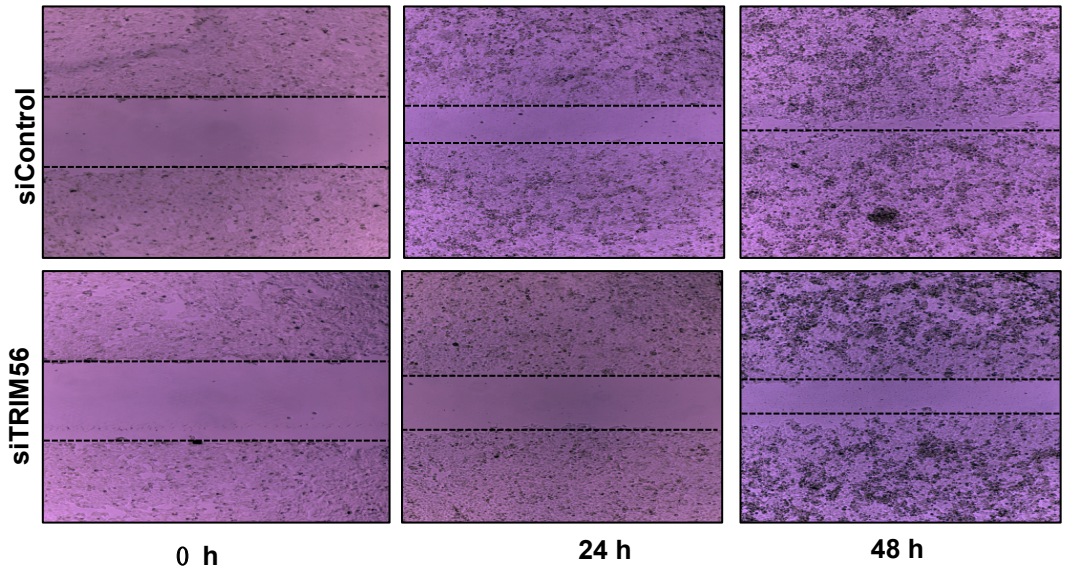

D

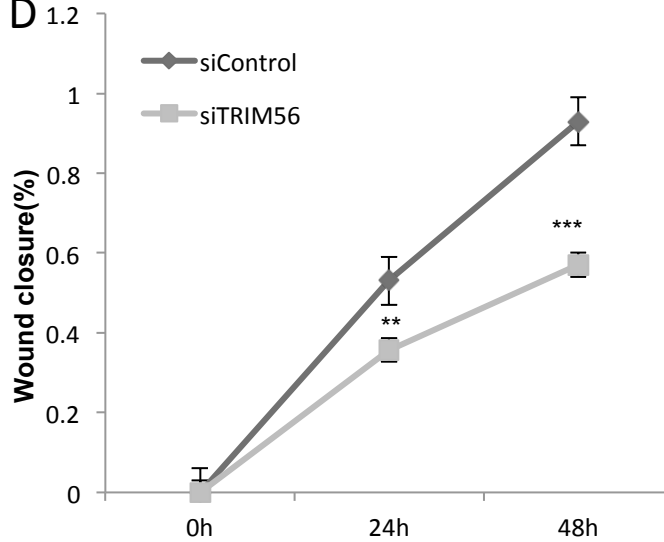

# Supplementary figure 4

**A**

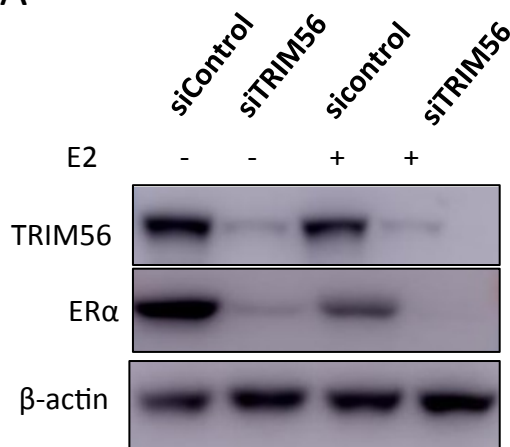

**B**

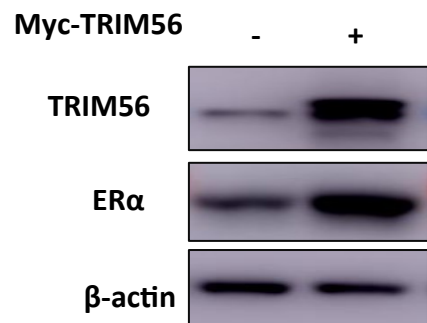

**C**

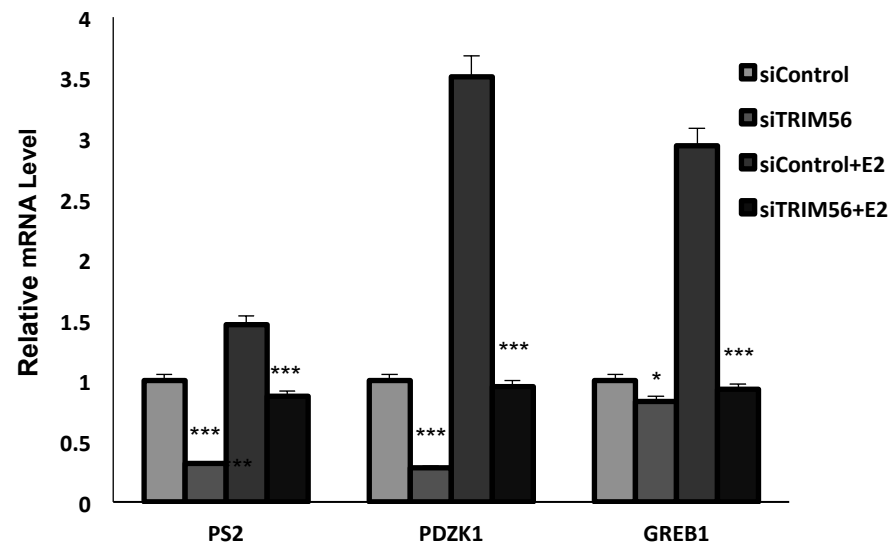

**D**

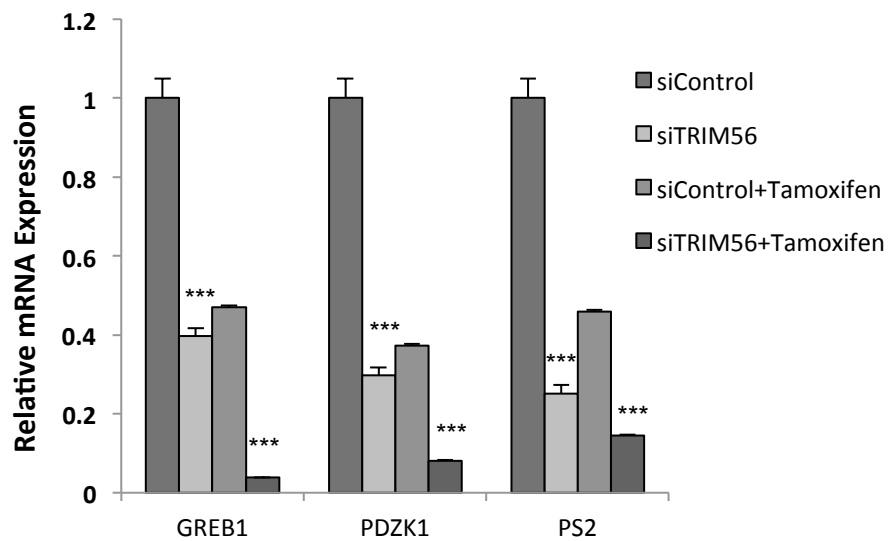

**E**

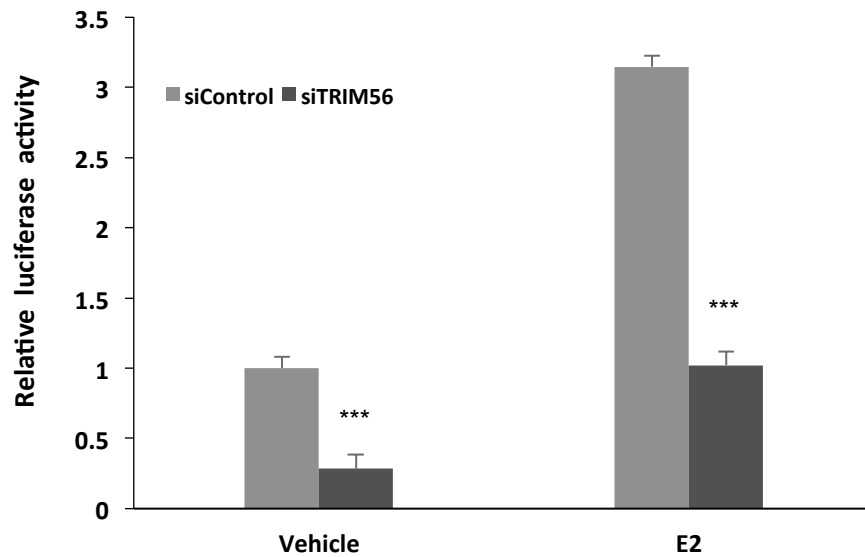

Supplementary figure 5

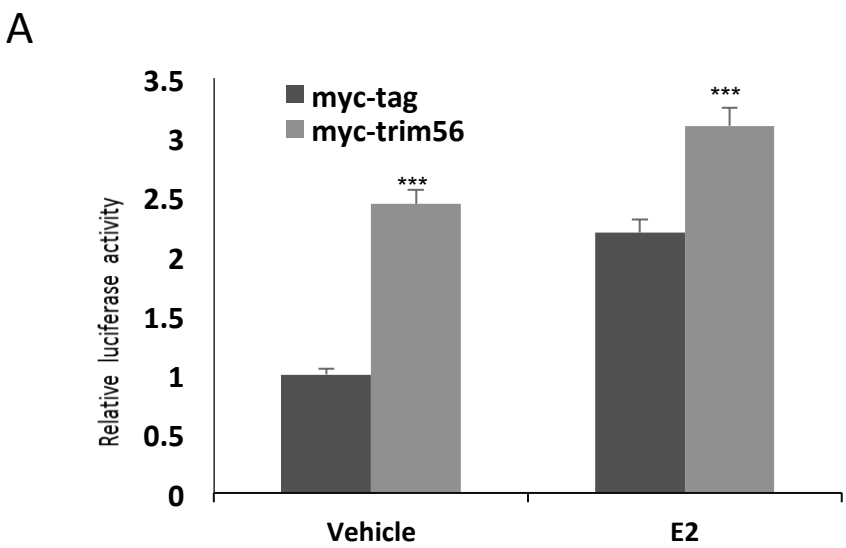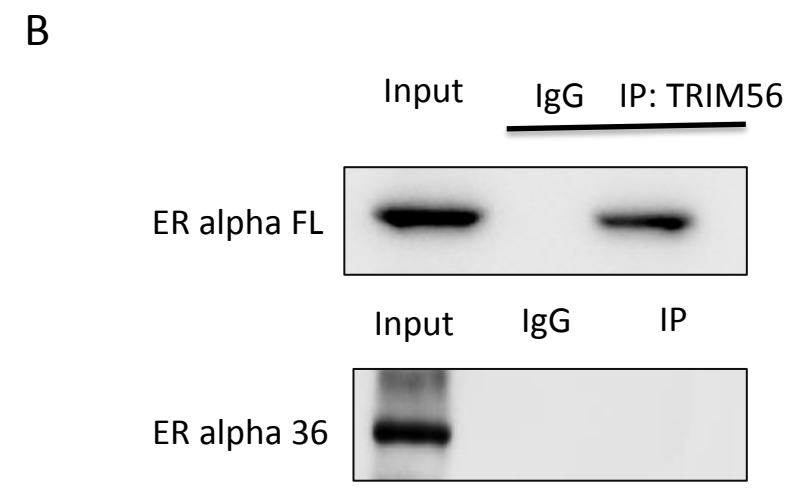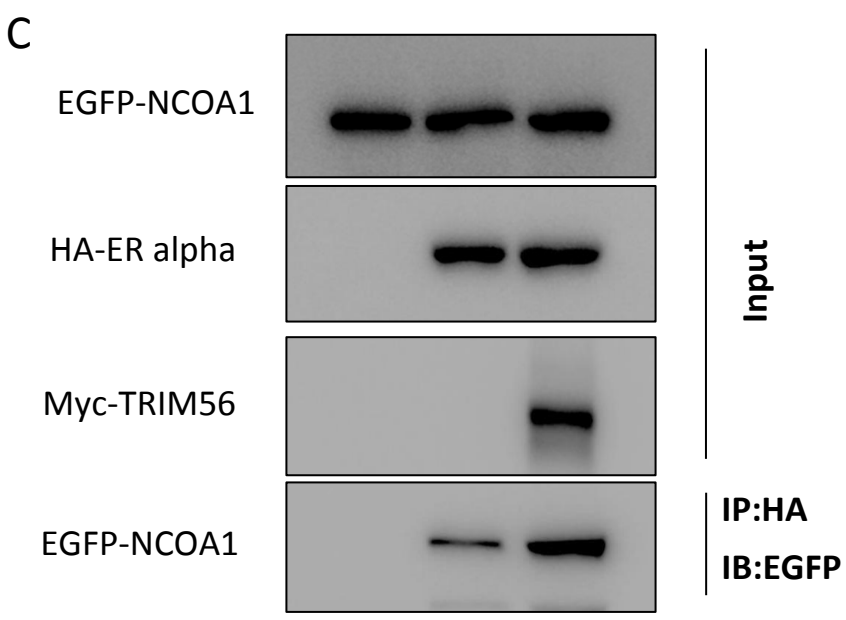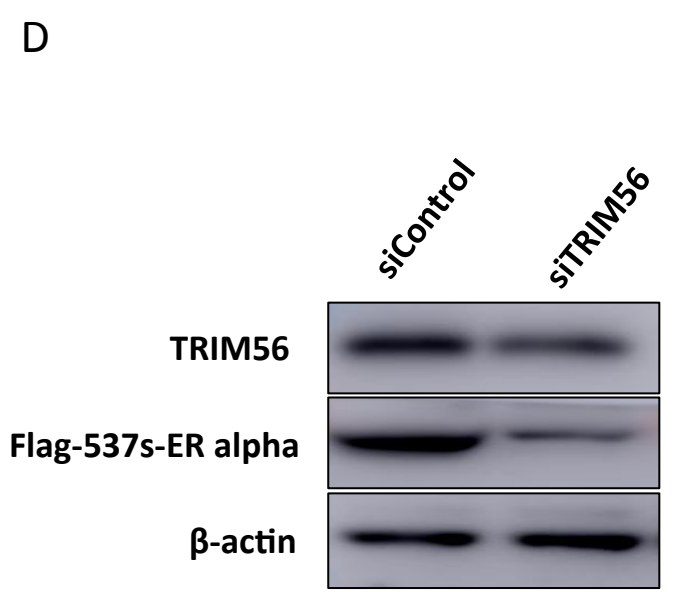

Supplementary figure 6

A

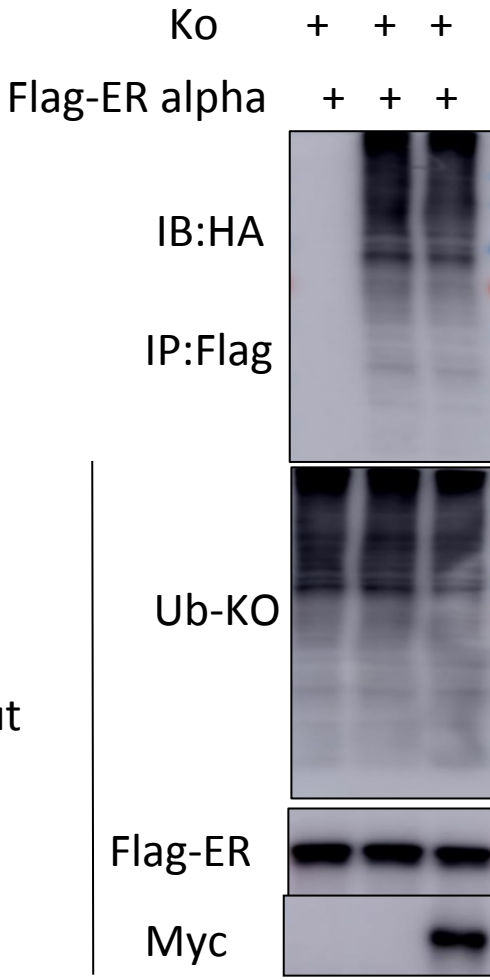

Supplement: 41389_2019_139_MOESM2_ESM.pdf [file 41389_2019_139_MOESM2_ESM.pdf]
