# Supplementary material for: Regulation of estrogen signaling and breast cancer proliferation by an ubiquitin ligase TRIM56
Source: PubMed Central journal article supplement (PMC6473003; doi:10.1038/s41389-019-0139-x), 2019-04-18
Supplement: 41389_2019_139_MOESM3_ESM.pdf [file 41389_2019_139_MOESM3_ESM.pdf]

# Supplementary table 1

| gene_short_name | sicontrol_1 | sicontrol_2 | sicontrol_3 | siTRIM56_1  | siTRIM56_2  | siTRIM56_3  |
|-----------------|-------------|-------------|-------------|-------------|-------------|-------------|
| ESR1            | 63.52726301 | 63.6379926  | 63.70861705 | 61.93742547 | 61.13834923 | 61.58497623 |
| IL20            | 63.84186415 | 63.36177012 | 63.52916175 | 57.32690605 | 57.75438376 | 57.46467231 |
| CXCL12          | 57.07213241 | 57.37625166 | 57.0393915  | 52.84855454 | 52.58146824 | 52.52592272 |
| N4BP3           | 57.33399437 | 57.4000975  | 57.28740045 | 54.82493982 | 54.85859479 | 55.09926246 |
| CELSR2          | 59.36065592 | 59.35699132 | 59.18357876 | 50.39759789 | 51.07013244 | 51.51477579 |
| XBP1            | 82.25227425 | 82.08782798 | 81.92651816 | 82.08782798 | 79.31476822 | 79.11489003 |
| ZNF703          | 59.98424178 | 59.83521321 | 59.88949528 | 57.11111624 | 56.77358945 | 56.71502561 |
| UPF1            | 60.23842421 | 60.28167009 | 60.20426054 | 58.80894071 | 58.99290844 | 58.98753649 |
| MTDH            | 69.28433738 | 69.60807842 | 69.27258949 | 65.7825294  | 66.01666867 | 66.27937584 |
| PDZK1           | 53.23253501 | 52.75544132 | 52.81670496 | 47.21734599 | 47.06038029 | 47.93024062 |
| H2AFY           | 71.68684792 | 71.57641959 | 71.74922592 | 65.21854277 | 66.20035454 | 66.18197377 |
| ABCA3           | 57.58256658 | 58.12983234 | 57.97876134 | 50.73227417 | 50.97064784 | 52.06370563 |
| RCL1            | 59.48098984 | 59.28777943 | 58.92095595 | 56.67150654 | 56.40599357 | 56.60602971 |
| DNHBB           | 57.52820485 | 57.20632995 | 57.18065174 | 54.79152453 | 54.79899388 | 55.15535788 |
| MSI2            | 67.6432842  | 67.49713059 | 67.37064274 | 65.22619083 | 64.72737816 | 64.7519316  |
| TFP1            | 86.61944396 | 85.86732908 | 85.74447602 | 81.60291051 | 82.00945087 | 81.94407448 |
| ACSS1           | 50.103648   | 49.95230431 | 49.9866649  | 44.25175552 | 44.59967208 | 45.52351992 |
| SMCR7L          | 56.83831239 | 57.27803937 | 57.02555633 | 55.27400613 | 55.20578643 | 55.31619262 |
| ELOVL5          | 66.75029951 | 66.62499441 | 66.59336841 | 64.45170772 | 64.82239671 | 64.92637773 |
| PBX1            | 62.36684604 | 62.22615019 | 61.86227965 | 60.14384992 | 59.85750441 | 60.01472195 |
| STYPL1          | 72.63713026 | 72.67125469 | 72.38285201 | 69.76045484 | 70.36376823 | 70.13683497 |
| HIVEP3          | 55.70360359 | 55.16569506 | 54.89697423 | 51.32974255 | 50.95632695 | 51.72302253 |
| MYC             | 71.64017273 | 71.81569858 | 71.80435152 | 69.6720136  | 69.00481948 | 69.36971032 |
| BCL2            | 63.34911217 | 62.40653561 | 62.40252452 | 58.39481585 | 57.67270471 | 58.36420982 |
| IL24            | 55.60880716 | 54.72791001 | 55.17163666 | 51.54851    | 52.0651808  | 51.46317882 |
| TMEM164         | 57.10241941 | 57.35909819 | 57.94624687 | 52.99023382 | 53.50467699 | 53.92450148 |
| SARS            | 75.64303201 | 76.02765406 | 75.66059367 | 74.426798   | 74.30648353 | 74.36031842 |
| HS6ST1          | 58.78868975 | 58.79864908 | 58.62734339 | 57.50644905 | 57.802295   | 57.58156737 |
| FRS2            | 56.29284707 | 56.51196381 | 56.4509362  | 55.2204924  | 55.10934429 | 54.84169465 |
| UBE2T           | 73.14247375 | 73.14334944 | 73.22131011 | 72.27417903 | 72.48167799 | 72.23736179 |
| BAMBI           | 71.48190529 | 71.60561903 | 71.7017984  | 67.52416035 | 68.22851862 | 68.73839094 |
| ZNF318          | 51.11890583 | 51.13194705 | 50.81560398 | 49.89783701 | 49.6389872  | 49.83118839 |
| PDLIM3          | 50.44972742 | 50.14615942 | 50.35367661 | 48.06662917 | 47.24546894 | 47.94893356 |
| RNF144B         | 46.63651148 | 46.94037071 | 46.43256202 | 44.91927894 | 45.07822719 | 44.67213996 |
| SMOC2           | 47.01467668 | 46.97079608 | 47.32996978 | 44.8687773  | 44.79393511 | 45.40228983 |
| PKTB            | 74.20109953 | 74.01350875 | 73.82279681 | 71.79746733 | 71.50613956 | 70.90727833 |
| JAK2            | 49.29647071 | 49.62817016 | 49.27297115 | 45.4439442  | 46.61253779 | 46.20974554 |
| PDCD4           | 74.97788705 | 75.31561957 | 75.31867418 | 73.43080289 | 73.85328918 | 73.7156507  |
| MYB             | 61.06696307 | 60.89946292 | 61.00180042 | 58.77163227 | 59.26697428 | 59.4640621  |
| GREB1           | 67.23571388 | 67.00454437 | 66.83802888 | 64.05912124 | 64.23955122 | 64.9811843  |
| TFAP2C          | 65.30579842 | 65.6663461  | 65.79047304 | 64.07334527 | 63.54591223 | 63.75737522 |
| ITPR1P          | 47.99619225 | 47.79295746 | 47.84879975 | 45.99861046 | 45.89682261 | 46.53390016 |
| LAPTM4B         | 73.71850665 | 73.64901963 | 73.57981016 | 73.0033638  | 72.93205295 | 73.14883821 |
| JKAMP           | 65.18841153 | 64.82209302 | 64.29132564 | 62.53393074 | 62.57903736 | 62.70569764 |
| PMAIP1          | 53.50262808 | 53.64950327 | 52.87304936 | 51.10657705 | 50.7892539  | 50.36210419 |
| RCC2            | 67.99869265 | 68.37913027 | 68.16332087 | 67.21406629 | 67.27346954 | 67.31707414 |
| TPD52L1         | 74.47620288 | 74.58233149 | 74.42574358 | 73.8979008  | 73.87640796 | 73.66506785 |
| MED13L          | 67.45585604 | 67.34930583 | 66.97005021 | 64.29631581 | 65.25098985 | 65.41117005 |
| IRX5            | 56.40970813 | 56.69261945 | 56.75359944 | 53.89639947 | 54.84089727 | 54.20130284 |
| OLFM1           | 61.75845541 | 61.42719589 | 62.12470351 | 57.93991305 | 58.7584645  | 59.17288404 |
| BGR3            | 52.55565544 | 53.31462433 | 53.01857948 | 50.92025545 | 50.6440869  | 51.19152709 |
| MSX2            | 54.51445878 | 53.89661608 | 54.612822   | 52.07146178 | 52.35133974 | 52.62562678 |
| SMTM15          | 65.64251781 | 64.61895136 | 65.68638437 | 62.82313745 | 62.54892439 | 62.79428539 |
